# Supplementary material for: Anthracene derivatives as broadband nonlinear optical materials: nonlinear absorption and excited-state dynamics analysis
Source: Royal Society of Chemistry journal article supplement (doi:10.1039/d0ra02638g), 2020-01-01
Supplement: d0ra02638g1.pdf [file d0ra02638g1.pdf]

## Supporting Information

### Anthracene Derivatives as Broadband Nonlinear Optical Materials: Nonlinear Absorption and Excited-state Dynamics Analysis

Wenfa Zhou<sup>a</sup>, Yu Fang<sup>b</sup>, Xingzhi Wu<sup>b</sup>, Yanbing Han<sup>c</sup>, Junyi Yang<sup>\*d</sup>, Lei Shen<sup>d</sup> and Yinglin Song<sup>\*c,d</sup>

<sup>a</sup> School of Optoelectronic Science and Engineering, Soochow University, Suzhou 215006, China

<sup>b</sup> Jiangsu Key Laboratory of Micro and Nano Heat Fluid Flow Technology and Energy Application, School of Mathematics and Physics, Suzhou University of Science and Technology, Suzhou 215009, China

<sup>c</sup> Department of Physics, Harbin Institute of Technology, Harbin 150001, China

<sup>d</sup> School of Physical Science and Technology, Soochow University, Suzhou 215006, China. E-mail: [yvsong@hit.edu.cn](mailto:yvsong@hit.edu.cn) and [yiy2010@suda.edu.cn](mailto:yiy2010@suda.edu.cn)

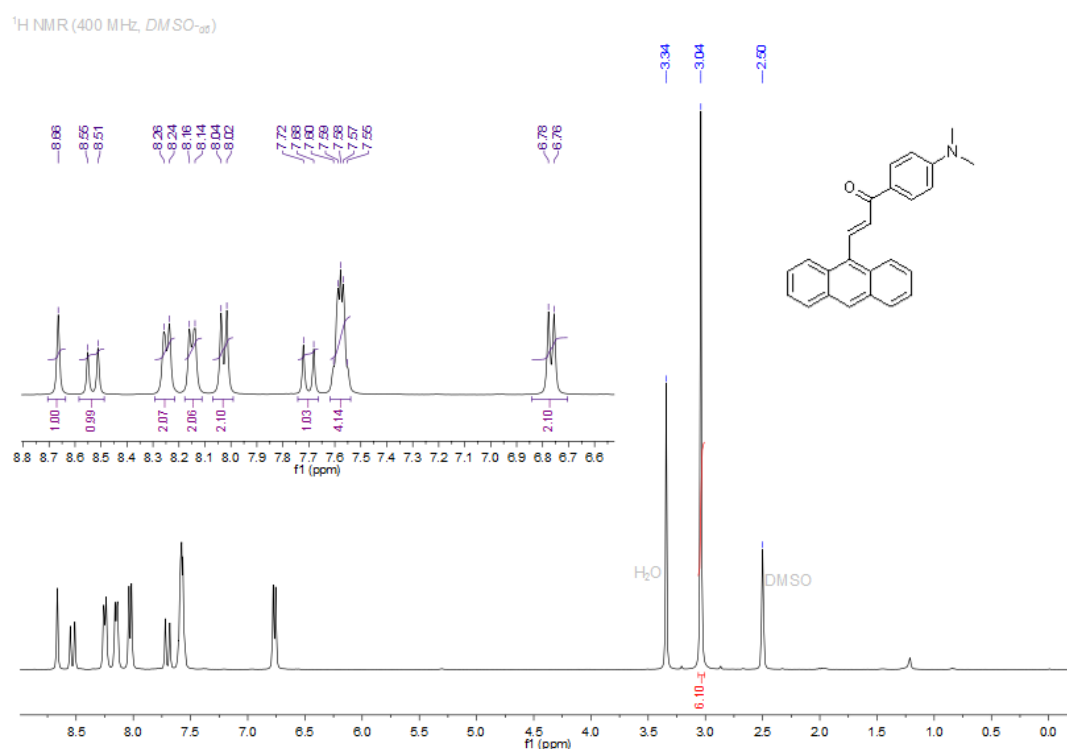

Fig. S1 <sup>1</sup>H NMR of AN-1

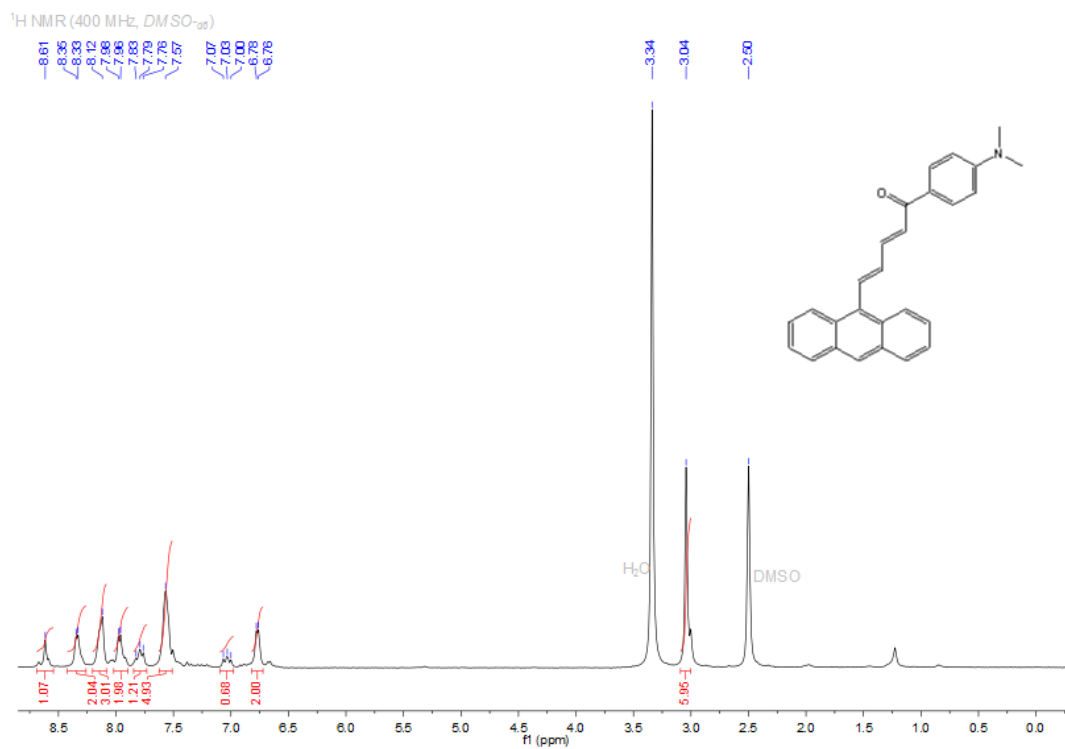

Fig. S2 <sup>1</sup>H NMR of AN-2

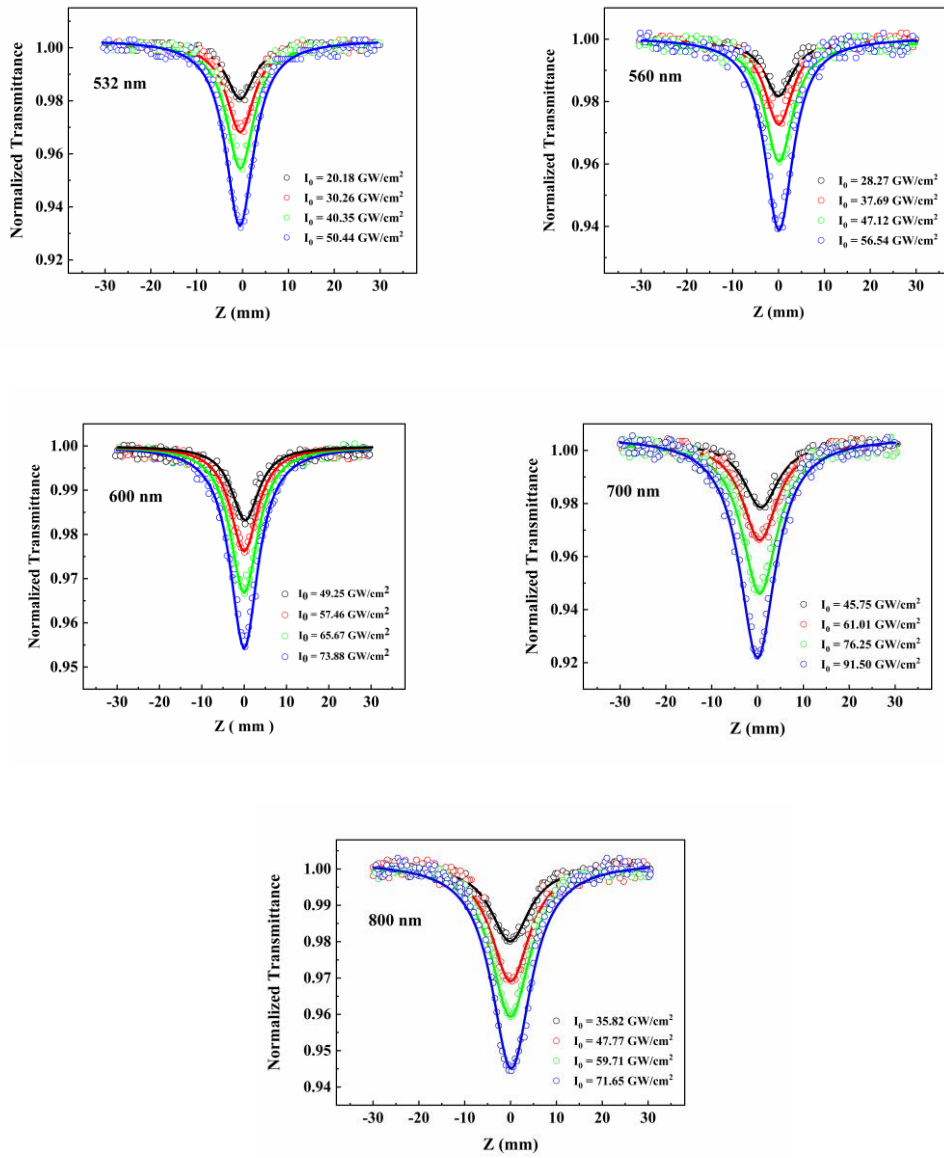

Fig. S3 Open-aperture Z-scan results of AN-1 at different excitation wavelengths (532 nm, 560 nm, 600 nm, 700 nm, 800 nm)

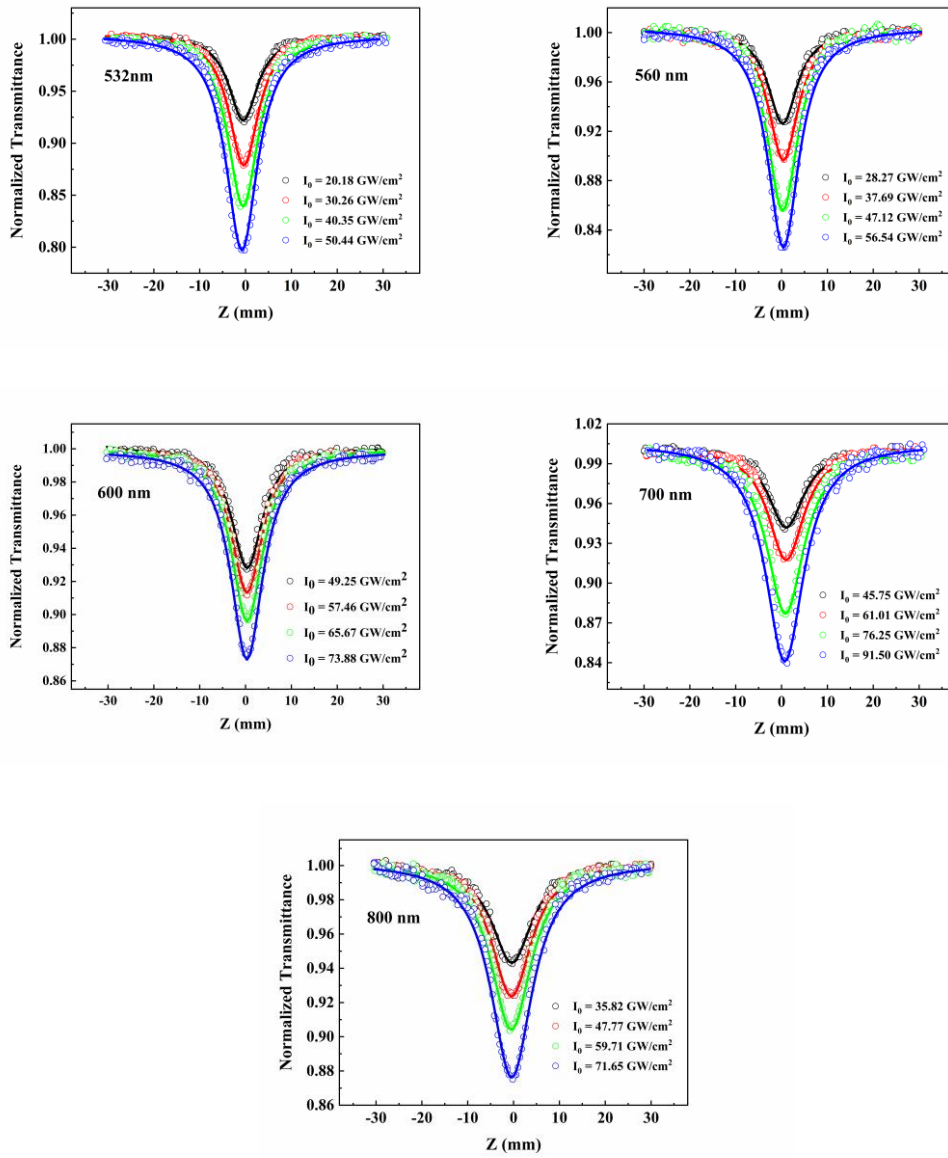

Fig. S4 Open-aperture Z-scan results of AN-2 at different excitation wavelengths (532 nm, 560 nm, 600 nm, 700 nm, 800 nm)
